# Supplementary material for: Cytoplasmic Domain of MscS Interacts with Cell Division Protein FtsZ: A Possible Non-Channel Function of the Mechanosensitive Channel in Escherichia Coli
Source: PubMed Central journal article supplement (PMC4440785; doi:10.1371/journal.pone.0127029), 2015-05-21
Supplement: pone.0127029.s008.pdf [file pone.0127029.s008.pdf]

S8A Fig.



S8B Fig.



S8C Fig.



**S8D Fig.**



S8E Fig.



**S8F Fig.**
